# Supplementary material
Source: bioRxiv or medRxiv preprint supplement (https://medrxiv.org/highwire/filestream/96470/field_highwire_adjunct_files/0/2020.09.10.20189696-1.pdf)
Supplement: Supplementary file [file 2020.09.10.20189696-1.pdf]

# Supplementary information for High COVID-19 transmission potential associated with re-opening universities can be mitigated with layered interventions.

Ellen Brooks-Pollock, Hannah Christensen, Adam Trickey, Gibran Hemani, Emily Nixon, Amy Thomas, Katy Turner, Adam Finn, Matt Hickman, Caroline Relton, Leon Danon

## 1. Data processing

The University of Bristol provided pseudonymised data relating to the academic year 2019/2020. The study complied with the University data protection policy for research studies (<http://www.bristol.ac.uk/media-library/sites/secretary/documents/information-governance/data-protection-policy.pdf>). We used this information to build a matrix of contacts between courses and year of study. In Figure S1 we show the schematic of how the contact matrix is built. Each line in the Raw data represents an individual student, and the columns show the relevant data fields (School name, Year, Term time postcode). This is transformed into a wide format matrix,  $W$ , where students that share accommodation, as indicated by a shared postcode, are summed up. In the final step, the wide format matrix,  $W$ , is multiplied by its transpose,  $W^T$ , and then normalised to give a household contact matrix  $h_{ij}$ . The entries of the H matrix denote the average number of contacts that a student in particular school has with any other school, through their accommodation.

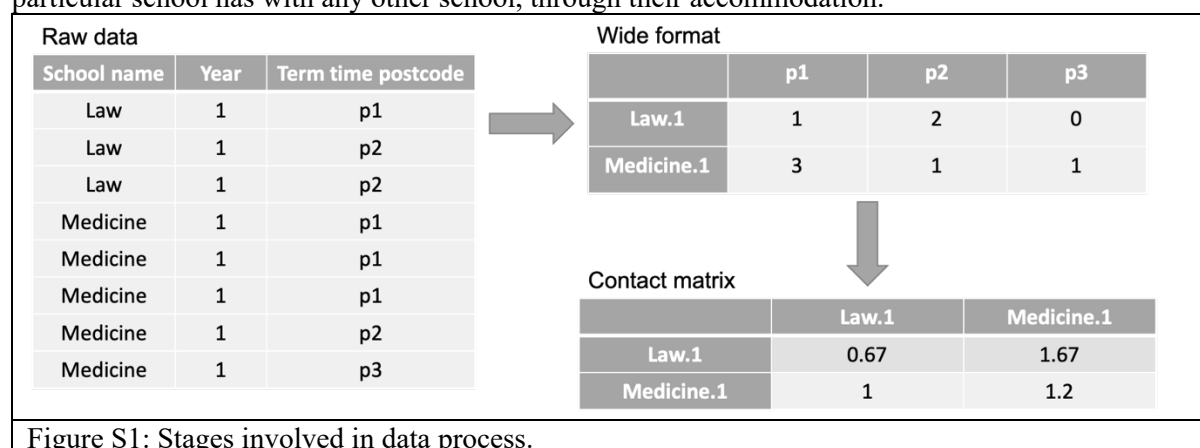

Figure S1: Stages involved in data process.

## 2. Estimating the reproduction number in a university setting.

In the university age population, we estimate that individuals have on average 10% more contacts than an individual in the general population using data from the Social Contact Survey. We also estimate that 25% of the cases in this population will show COVID-19 symptoms (Davies 2020). However, there is substantial uncertainty around the relative infectiousness of asymptomatic cases. In Figure S2 we vary the relative infectiousness of asymptomatic individuals under the assumption that they are less infectious than symptomatic individuals, and assess the impact on  $R$  in the university  $R_u$ . Beginning with the reproduction number in the general population,  $R = 2.7$ , we observe that in the University population,  $R_u$  varies between 1.7 when  $\epsilon=0.1$  (due to the reduced infectiousness of asymptomatic cases), and 3.4 when  $\epsilon=1$  (due to the increased number of contacts in the university population).

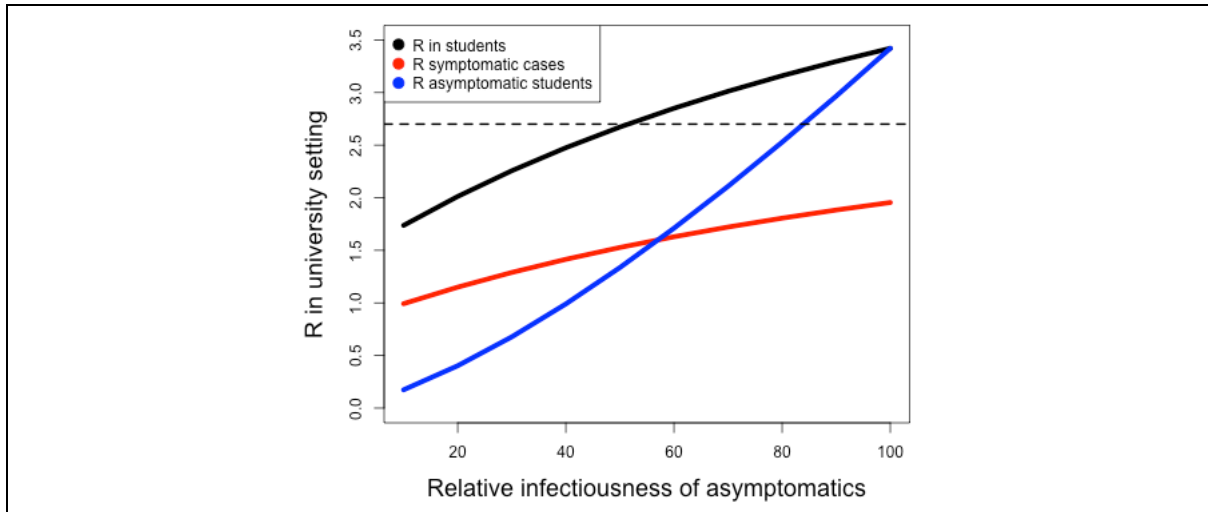

Figure S2: The reproduction number in a university setting as a function of the relative infectiousness of asymptomatic cases, under the assumption that  $R = 2.7$  in the general population.

### 3. Sensitivity to model parameters and impact of asymptomatic transmission on model dynamics

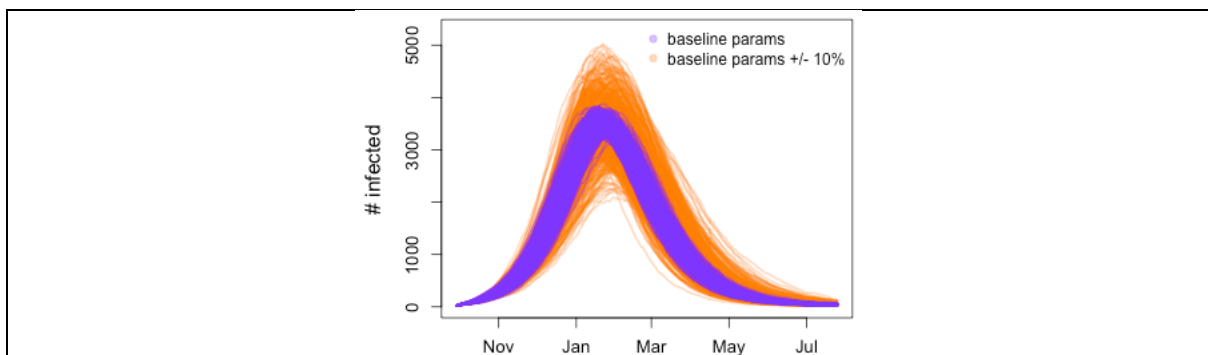

Figure S3: Epidemic trajectories for the model with baseline parameters and varying baseline parameters by +/- 10%.

Figure S3 shows the model sensitivity to parameter variation. Because the relative infectiousness of asymptomatic cases, the parameter  $\varepsilon$ , was the most uncertain and a key parameter for this population, we performed extensive simulations to analyse the sensitivity of our model to this parameter (figure S4). The results are summarised in Figure S4 below. For low values  $\varepsilon$  (0.1 - 0.2), the epidemic peak is small and the epidemic continues at a low level throughout the academic year with the expected number of symptomatic cases barely rising above 1. For low-intermediate values of  $\varepsilon$  (0.3-0.5) the peak number of cases rises rapidly, and the epidemic increases in speed, peaking after the Christmas break. For high values of  $\varepsilon$  (0.6 and above) the epidemic peak is at or just before the Christmas break in the baseline case. The highest number of cases at Christmas is observed for  $\varepsilon = 0.7$  in the baseline case. For  $\varepsilon = 1$ , a peak at Christmas is observed when mitigation strategies are implemented.

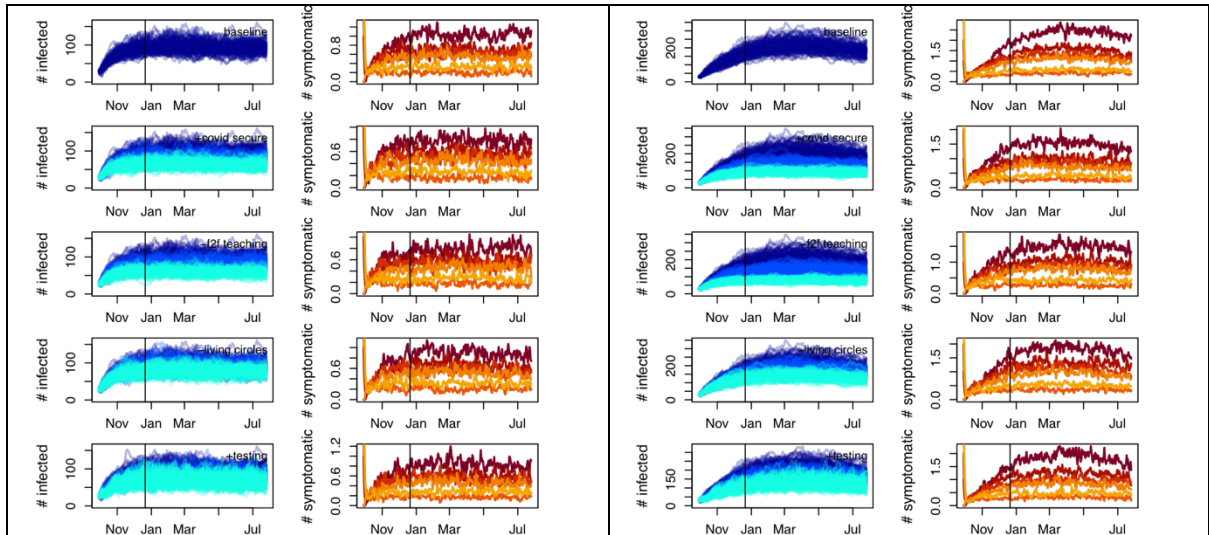

$\epsilon = 0.1$

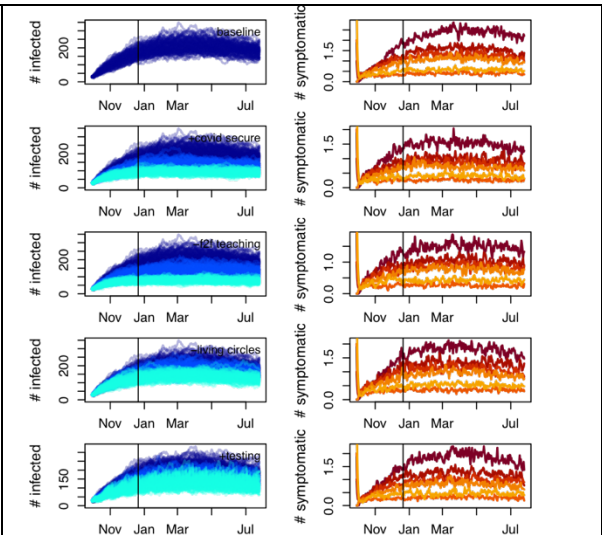

$\epsilon = 0.2$

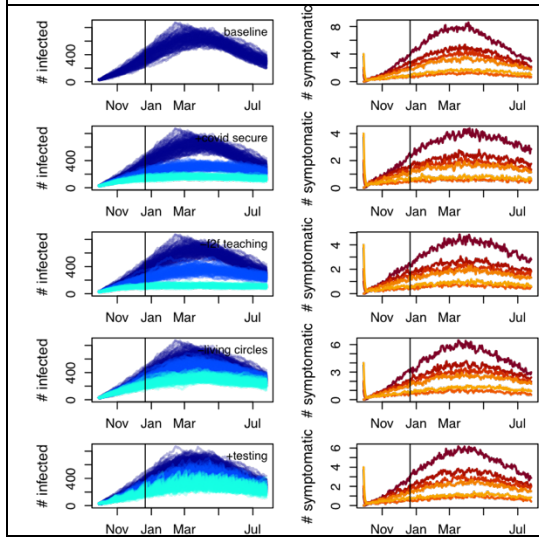

$\epsilon = 0.3$

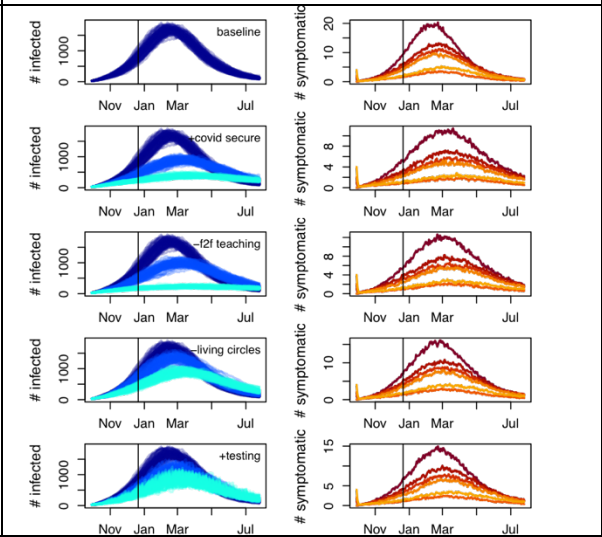

$\epsilon = 0.4$

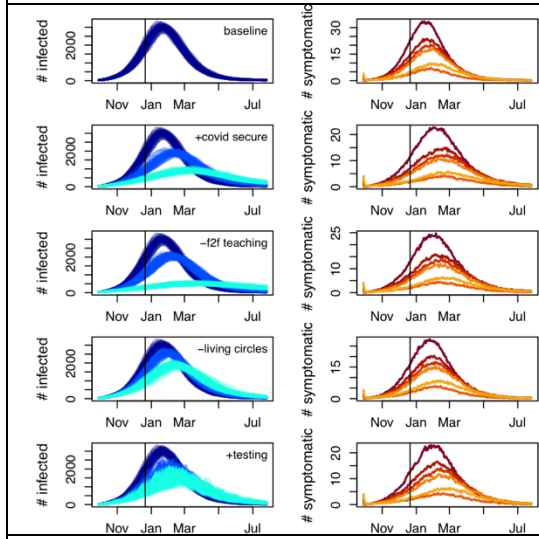

$\epsilon = 0.5$

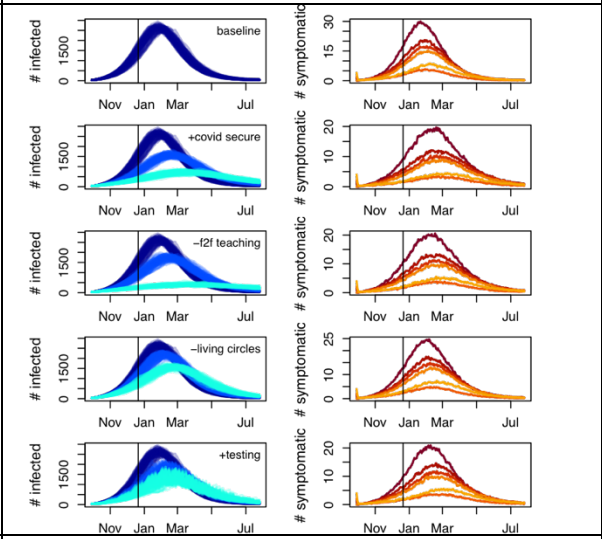

$\epsilon = 0.6$

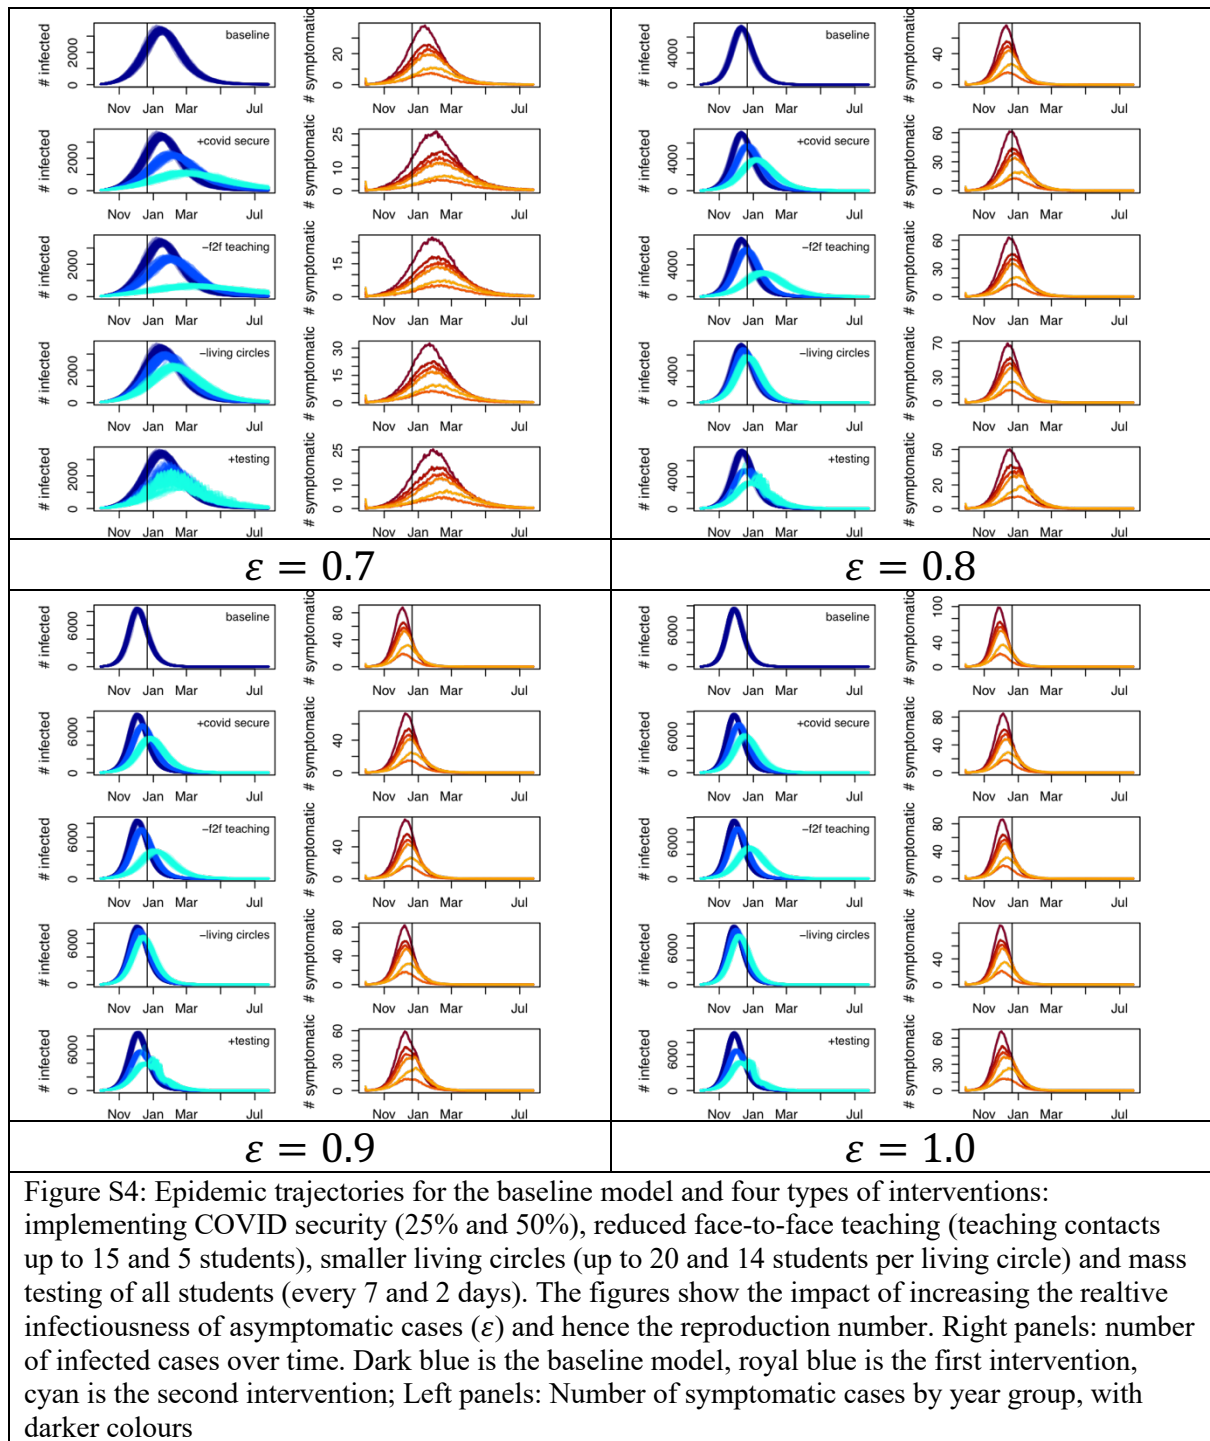

## 4. Impact of testing frequency

To assess the robustness of our results, we performed sensitivity analysis of the relative asymptomatic infectiousness, as captured by  $\epsilon$  on the results of impact of testing frequency. We considered three values of  $\epsilon$ , shown below in figure S5.

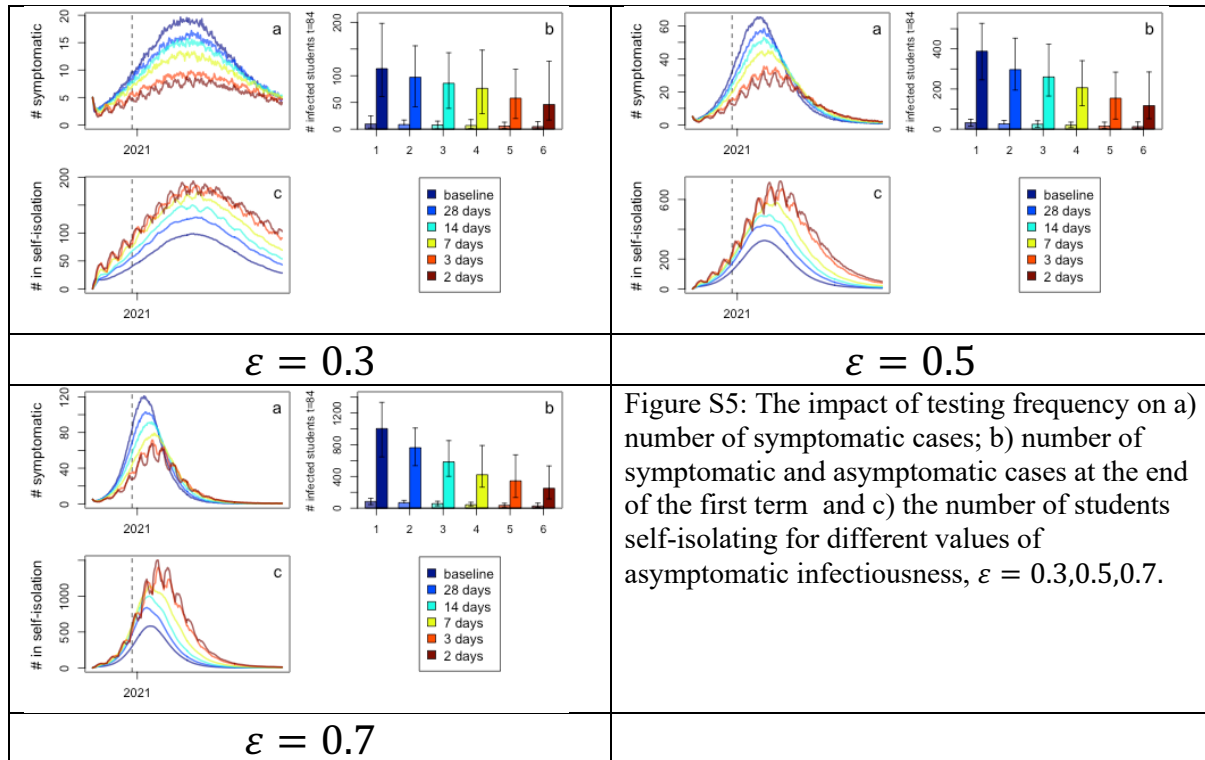

| SCENARIO NUM | INTERVENTION | EPSILON | Ru   | # symp cases at xmas (mean) |     |              | rank based on # symp cases |      |      | # asym cases at xmas (mean) |     |     | R_xm as (%) |     |       | RANK RX | growthrate |     |     | doubling time (days) |     |     | R_end (%) |     |     |
|--------------|--------------|---------|------|-----------------------------|-----|--------------|----------------------------|------|------|-----------------------------|-----|-----|-------------|-----|-------|---------|------------|-----|-----|----------------------|-----|-----|-----------|-----|-----|
|              |              |         |      | min                         | max | # symp cases | min                        | max  | min  | max                         | min | max | min         | max | min   |         | max        | min | max | min                  | max | min | max       | min | max |
| 1            | baseline     | 30      | 2.25 | 13                          | 4   | 23           | 9                          | 150  | 100  | 230                         | 4.8 | 3.4 | 6.7         | 9   | 0.053 | 0.022   | 0.089      | 13  | 7.8 | 32                   | 34  | 29  | 38        |     |     |
| 2            | CS25         | 30      | 2.25 | 7.5                         | 2   | 17           | 4                          | 95   | 52   | 140                         | 3.3 | 2.4 | 4.4         | 3   | 0.046 | 0.022   | 0.077      | 15  | 9   | 32                   | 19  | 15  | 23        |     |     |
| 3            | CS50         | 30      | 2.25 | 4.8                         | 0   | 10           | 2                          | 61   | 38   | 100                         | 2.4 | 1.9 | 3.3         | 2   | 0.041 |         | 0.078      | 17  | 8.9 |                      | 11  | 9.5 | 13        |     |     |
| 4            | f2ft15       | 30      | 2.25 | 8.4                         | 2   | 16           | 6                          | 100  | 73   | 150                         | 3.5 | 2.7 | 4.6         | 5   | 0.047 | 0.009   | 0.068      | 15  | 10  | 78                   | 21  | 17  | 25        |     |     |
| 5            | f2ft5        | 30      | 2.25 | 3.9                         | 0   | 11           | 1                          | 50   | 31   | 73                          | 2.1 | 1.7 | 2.6         | 1   | 0.037 |         | 0.071      | 19  | 9.8 |                      | 8.5 | 7.5 | 9.7       |     |     |
| 6            | LC20         | 30      | 2.25 | 10                          | 2   | 22           | 8                          | 130  | 79   | 180                         | 4.1 | 3   | 5.5         | 8   | 0.053 | 0.023   | 0.088      | 13  | 7.9 | 30                   | 27  | 22  | 32        |     |     |
| 7            | LC14         | 30      | 2.25 | 8                           | 2   | 21           | 5                          | 98   | 50   | 160                         | 3.4 | 2.6 | 4.6         | 4   | 0.047 | 0.017   | 0.081      | 15  | 8.6 | 41                   | 20  | 16  | 24        |     |     |
| 8            | T7           | 30      | 2.25 | 9.8                         | 1   | 20           | 7                          | 98   | 47   | 190                         | 4.1 | 2.6 | 6.1         | 7   | 0.025 |         | 0.072      | 28  | 9.6 |                      | 28  | 23  | 34        |     |     |
| 9            | T2           | 30      | 2.25 | 6.4                         | 1   | 27           | 3                          | 66   | 25   | 140                         | 3.7 | 2.7 | 4.9         | 6   |       |         | 0.086      |     | 8.1 |                      | 24  | 20  | 28        |     |     |
| 1            | baseline     | 50      | 2.67 | 71                          | 48  | 100          | 9                          | 820  | 590  | 1000                        | 19  | 13  | 24          | 9   | 0.073 | 0.028   | 0.1        | 9.5 | 6.9 | 25                   | 73  | 71  | 75        |     |     |
| 2            | CS25         | 50      | 2.67 | 35                          | 15  | 53           | 5                          | 410  | 270  | 550                         | 10  | 7.4 | 13          | 5   | 0.065 | 0.04    | 0.091      | 11  | 7.6 | 17                   | 60  | 58  | 63        |     |     |
| 3            | CS50         | 50      | 2.67 | 16                          | 3   | 36           | 2                          | 200  | 120  | 300                         | 5.7 | 4   | 7.7         | 2   | 0.057 | 0.029   | 0.086      | 12  | 8.1 | 24                   | 41  | 36  | 44        |     |     |
| 4            | f2ft15       | 50      | 2.67 | 39                          | 19  | 60           | 7                          | 460  | 320  | 620                         | 11  | 7.8 | 16          | 6   | 0.067 | 0.032   | 0.1        | 10  | 6.9 | 22                   | 63  | 61  | 65        |     |     |
| 5            | f2ft5        | 50      | 2.67 | 11                          | 4   | 20           | 1                          | 130  | 80   | 200                         | 4.2 | 3.1 | 5.3         | 1   | 0.049 | 0.025   | 0.077      | 14  | 9   | 28                   | 28  | 24  | 31        |     |     |
| 6            | LC20         | 50      | 2.67 | 54                          | 31  | 80           | 8                          | 640  | 430  | 820                         | 15  | 11  | 19          | 8   | 0.071 | 0.041   | 0.11       | 9.8 | 6.3 | 17                   | 70  | 68  | 72        |     |     |
| 7            | LC14         | 50      | 2.67 | 34                          | 16  | 55           | 4                          | 410  | 220  | 600                         | 10  | 6.2 | 14          | 3   | 0.066 | 0.04    | 0.095      | 11  | 7.3 | 17                   | 62  | 60  | 64        |     |     |
| 8            | T7           | 50      | 2.67 | 37                          | 21  | 79           | 6                          | 360  | 240  | 750                         | 13  | 9.3 | 19          | 7   | 0.044 | 0.006   | 0.083      | 16  | 8.4 | 120                  | 69  | 67  | 72        |     |     |
| 9            | T2           | 50      | 2.67 | 27                          | 3   | 60           | 3                          | 260  | 83   | 490                         | 10  | 7   | 15          | 4   | 0.012 | -0.03   | 0.076      | 58  | 9.1 |                      | 65  | 61  | 67        |     |     |
| 1            | baseline     | 70      | 3.01 | 220                         | 190 | 280          | 9                          | 2600 | 2300 | 2800                        | 59  | 48  | 66          | 9   | 0.094 | 0.067   | 0.12       | 7.4 | 5.8 | 10                   | 89  | 88  | 90        |     |     |
| 2            | CS25         | 70      | 3.01 | 140                         | 98  | 180          | 5                          | 1700 | 1400 | 1900                        | 36  | 28  | 44          | 5   | 0.083 | 0.053   | 0.11       | 8.4 | 6.3 | 13                   | 82  | 80  | 83        |     |     |
| 3            | CS50         | 70      | 3.01 | 68                          | 46  | 92           | 3                          | 790  | 480  | 1100                        | 18  | 11  | 23          | 2   | 0.071 | 0.043   | 0.11       | 9.8 | 6.3 | 16                   | 70  | 68  | 71        |     |     |
| 4            | f2ft15       | 70      | 3.01 | 160                         | 120 | 200          | 7                          | 1900 | 1500 | 2100                        | 40  | 31  | 48          | 6   | 0.084 | 0.054   | 0.11       | 8.3 | 6.3 | 13                   | 83  | 82  | 85        |     |     |
| 5            | f2ft5        | 70      | 3.01 | 40                          | 23  | 61           | 1                          | 480  | 360  | 650                         | 12  | 8.7 | 15          | 1   | 0.064 | 0.032   | 0.1        | 11  | 6.9 | 22                   | 61  | 59  | 63        |     |     |
| 6            | LC20         | 70      | 3.01 | 190                         | 140 | 240          | 8                          | 2300 | 1900 | 2500                        | 50  | 39  | 57          | 8   | 0.089 | 0.058   | 0.12       | 7.8 | 5.8 | 12                   | 87  | 86  | 88        |     |     |
| 7            | LC14         | 70      | 3.01 | 140                         | 88  | 170          | 6                          | 1600 | 1200 | 1900                        | 35  | 24  | 43          | 4   | 0.083 | 0.051   | 0.12       | 8.4 | 5.8 | 14                   | 84  | 83  | 84        |     |     |
| 8            | T7           | 70      | 3.01 | 130                         | 88  | 160          | 4                          | 1200 | 1000 | 1300                        | 42  | 33  | 48          | 7   | 0.066 | 0.036   | 0.092      | 11  | 7.5 | 19                   | 87  | 86  | 88        |     |     |
| 9            | T2           | 70      | 3.01 | 58                          | 30  | 180          | 2                          | 500  | 320  | 1700                        | 28  | 19  | 40          | 3   | 0.031 | 0.002   | 0.081      | 22  | 8.6 | 410                  | 84  | 83  | 86        |     |     |
| 1            | baseline     | 100     | 3.4  | 130                         | 90  | 170          | 1                          | 2000 | 1600 | 2500                        | 94  | 92  | 94          | 9   | 0.12  | 0.098   | 0.15       | 5.8 | 4.6 | 7.1                  | 97  | 96  | 97        |     |     |
| 2            | CS25         | 100     | 3.4  | 210                         | 150 | 250          | 7                          | 2800 | 2300 | 3200                        | 84  | 80  | 88          | 4   | 0.11  | 0.085   | 0.14       | 6.3 | 5   | 8.2                  | 94  | 94  | 95        |     |     |
| 3            | CS50         | 100     | 3.4  | 220                         | 180 | 260          | 8                          | 2700 | 2500 | 2900                        | 62  | 51  | 70          | 2   | 0.094 | 0.069   | 0.12       | 7.4 | 5.8 | 10                   | 88  | 87  | 89        |     |     |
| 4            | f2ft15       | 100     | 3.4  | 200                         | 140 | 260          | 6                          | 2700 | 2100 | 3200                        | 86  | 82  | 89          | 6   | 0.11  | 0.081   | 0.13       | 6.3 | 5.3 | 8.6                  | 95  | 94  | 95        |     |     |
| 5            | f2ft5        | 100     | 3.4  | 180                         | 140 | 240          | 4                          | 2200 | 1900 | 2500                        | 47  | 36  | 57          | 1   | 0.087 | 0.034   | 0.12       | 8   | 5.8 | 20                   | 83  | 82  | 84        |     |     |
| 6            | LC20         | 100     | 3.4  | 160                         | 120 | 220          | 3                          | 2300 | 2000 | 3000                        | 91  | 89  | 93          | 8   | 0.12  | 0.099   | 0.14       | 5.8 | 5   | 7                    | 96  | 96  | 97        |     |     |
| 7            | LC14         | 100     | 3.4  | 220                         | 170 | 280          | 9                          | 2900 | 2400 | 3300                        | 85  | 81  | 88          | 5   | 0.11  | 0.078   | 0.13       | 6.3 | 5.3 | 8.9                  | 95  | 94  | 95        |     |     |
| 8            | T7           | 100     | 3.4  | 180                         | 140 | 250          | 5                          | 2000 | 1500 | 2400                        | 87  | 83  | 89          | 7   | 0.096 | 0.07    | 0.12       | 7.2 | 5.8 | 9.9                  | 96  | 96  | 97        |     |     |
| 9            | T2           | 100     | 3.4  | 140                         | 85  | 220          | 2                          | 1200 | 740  | 2100                        | 74  | 68  | 79          | 3   | 0.059 | 0.025   | 0.084      | 12  | 8.3 | 28                   | 95  | 94  | 95        |     |     |

Table S1: Values of model outputs by intervention scenario and relative infectiousness of asymptomatics.
